# Supplementary material for: Window films increase avoidance of collisions by birds but only when applied to external compared with internal surfaces of windows
Source: PeerJ. 2023 Feb 2;11:e14676. doi: 10.7717/peerj.14676 (PMC9899435; doi:10.7717/peerj.14676)
Supplement: Supplemental Information 1 [file peerj-11-14676-s001.xlsx]

## Sheet: BirdShadesOutside
Bird	BinaryControl	BinaryTreatment	AvoidControl	AvoidTreatment
6724	1	0	1	0
6727	1	0	1	0
6705	0.5	0.5	1	0
6751	1	0	1	1
6639	0.5	0.5	1	1
6615	1	0	1	0
6752	0.5	0.5	1	0
6759	0.5	0.5	1	1
6720	1	0	0	0
6636	0	1	1	0
6546	0.5	0.5
6216	1	0	1	1
6126	0.5	0.5	1	1
6427	0.5	0.5	1	1
6650	0.5	0.5	1	1
6424	1	0	1	0
6677	1	0	1	0
6651	1	0	1	1
Raw data from trials employing the BirdShades treatment on the outside surface of windows.
Columns B and C contain to outcomes from the binary choice collision trials.
Column D is the outcomes from control avoidance trials.
Column E is the outcomes from treatment avoidance trials.

## Sheet: BirdShadesInside
Bird	BinaryControl	BinaryTreatment	AvoidControl	AvoidTreatment
6825	0.5	0.5	0	0
6793	1	0	0	1
6852	0	1	1	0
6491	0.5	0.5	0	1
6786	1	0	1	1
6781	0.5	0.5	0	0
6832	0.5	0.5	1	0
6767	0	1	0	1
6493	0.5	0.5	1	0
6839	1	0	0	1
6848	0.5	0.5	1	0
6817	0.5	0.5	1	0
6801	0	1
6797	1	0	1	1
6798	0	1	0	0
6498	1	0	1	0
6831	1	0	0	0
6787	1	0	0	0
Raw data from trials employing the BirdShades treatment on the inside surface of windows.
Columns B and C contain to outcomes from the binary choice collision trials.
Column D is the outcomes from control avoidance trials.
Column E is the outcomes from treatment avoidance trials.

## Sheet: HaverkampOutside
Bird	BinaryControl	BinaryTreatment	AvoidControl	AvoidTreatment
6803	1	0	1	0
6840	0.5	0.5	0	1
6779	1	0	0	0
6815	0	1	1	0
6829	0	1	1	0
6820	1	0	0	1
6489	1	0	0	1
6796	1	0	1	0
6843	0.5	0.5	0	0
6770			1	0
6810	1	0	1	0
6847	0.5	0.5	1	0
6765	1	0	0	1
6826	0.5	0.5	1	0
6809	0	1	1	0
6808	0.5	0.5	0	0
6836	1	0	1	0
6828	1	0	1	0
Raw data from trials employing the Haverkamp treatment on the outside surface of windows.
Columns B and C contain to outcomes from the binary choice collision trials.
Column D is the outcomes from control avoidance trials.
Column E is the outcomes from treatment avoidance trials.

## Sheet: HaverkampInside
Bird	BinaryControl	BinaryTreatment	AvoidControl	AvoidTreatment
6812	0.5	0.5	1	1
6821	1	0	1	1
6853	0.5	0.5	1	1
6795	1	0	0	1
6816	0	1	1	1
6833	0.5	0.5	0	0
6775	0	1	0	1
6818	1	0	1	0
6791	0	1	1	1
6811	0.5	0.5	1	1
6794	0	1	0	1
6799	1	0	1	0
6768	0.5	0.5	0	0
6494	0	1	0	0
6777	1	0	1	0
6789	0.5	0.5	0	1
6806	0.5	0.5	1	1
6792	0.5	0.5	0	1
Raw data from trials employing the Haverkamp treatment on the inside surface of windows.
Columns B and C contain to outcomes from the binary choice collision trials.
Column D is the outcomes from control avoidance trials.
Column E is the outcomes from treatment avoidance trials.

## Sheet: Combined
	ExteriorAvoidance	InteriorAvoidance
Haverkamp	1	0
Haverkamp	-1	0
Haverkamp	0	0
Haverkamp	1	-1
Haverkamp	1	0
Haverkamp	-1	0
Haverkamp	-1	-1
Haverkamp	1	1
Haverkamp	0	0
Haverkamp	1	0
Haverkamp	1	-1
Haverkamp	1	1
Haverkamp	-1	0
Haverkamp	1	0
Haverkamp	1	1
Haverkamp	0	-1
Haverkamp	1	0
Haverkamp	1	-1
BirdShades	1	0
BirdShades	1	-1
BirdShades	1	1
BirdShades	0	-1
BirdShades	0	0
BirdShades	1	0
BirdShades	1	1
BirdShades	0	-1
BirdShades	0	1
BirdShades	1	-1
BirdShades	0	1
BirdShades	0	0
BirdShades	0	0
BirdShades	0	0
BirdShades	1	1
BirdShades	1	0
BirdShades	0	0
These data report the within-individual change in avoidance of both windows when a film product (column A) is applied to exterior (column B) or interior (column C) surface of the windows.
Positive number indicates that a bird was more likely to avoid the window in the treatment condition.
Negative number indicates that a bird was more likely to avoid the window in the control condition.
Zero indicates no difference in avoidance behavior between control and treatment conditions for that bird.
